# Supplementary material
Source: Springer Nature journal article supplement (https://www.springermedizin.de/resource/supplementary/12889_2008_1507_MOESM1_ESM.pdf/9503304)
Supplement: MOESM1 [file 9503304]

Individual sickness spell duration, days

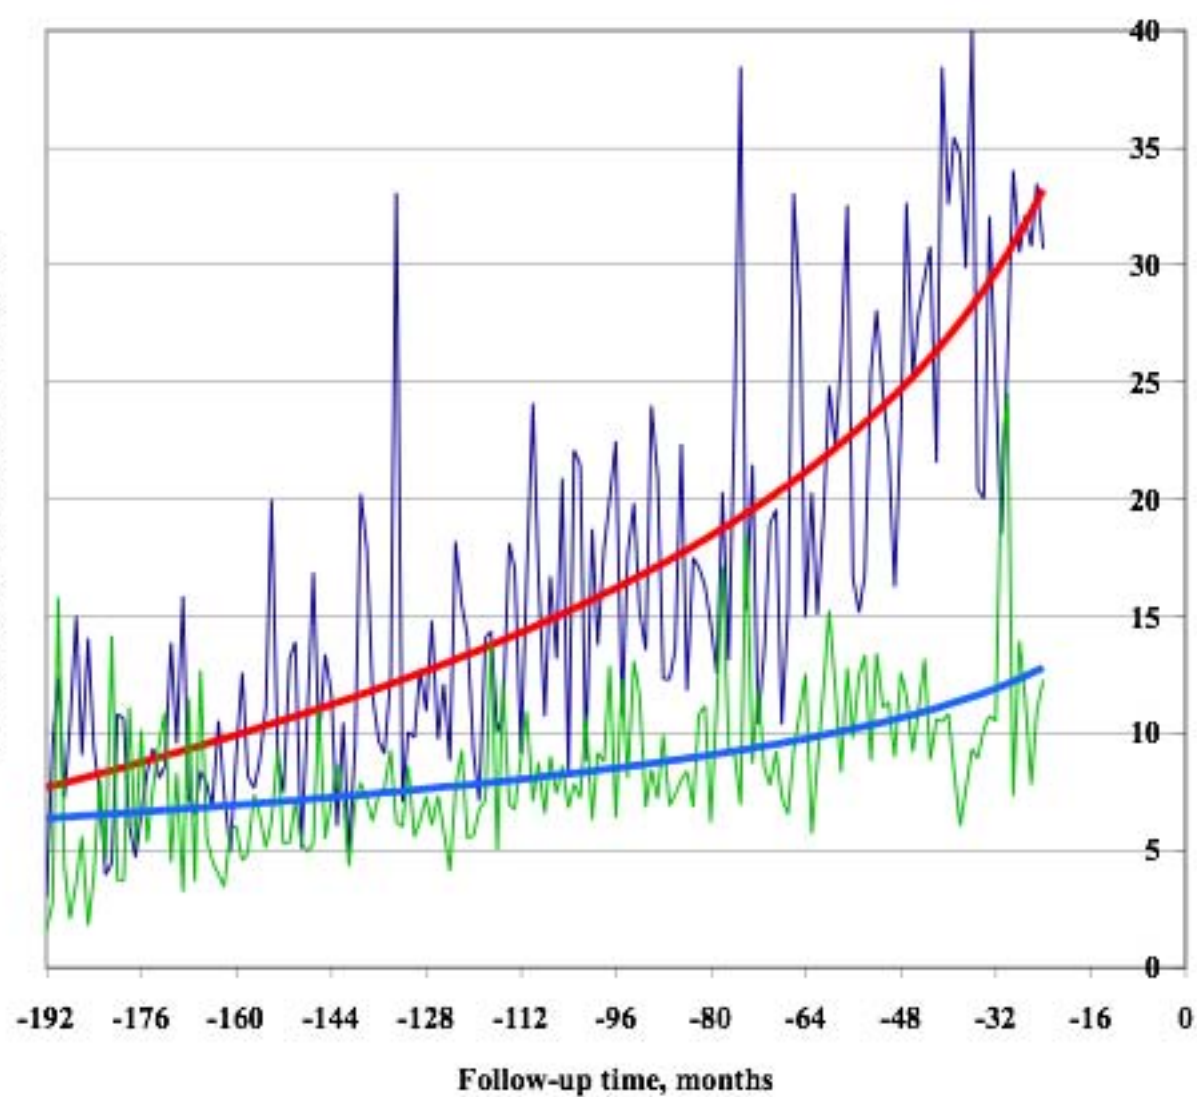

- Disability beneficiaries, monthly means
- Disability beneficiaries, trend line
- Referents, monthly means
- Referents, trend line
